# Supplementary material for: Discovery and characterization of novel paramyxoviruses from bat samples in China
Source: PubMed Central journal article supplement — Virol Sin. 2023 Jan 14;38(2):198–207. doi: 10.1016/j.virs.2023.01.002 (PMC10176441; doi:10.1016/j.virs.2023.01.002), 2023-01-14
Supplement: mmc1.pdf [file mmc1.pdf]

# Virologica Sinica

## Supplementary Data

### Discovery and characterization of novel paramyxoviruses from bat samples in China

Haoxiang Su<sup>a, 1</sup>, Yuyang Wang<sup>a, 1</sup>, Yelin Han<sup>a, 1</sup>, Qi Jin<sup>a, \*</sup>, Fan Yang<sup>a, \*</sup>, Zhiqiang Wu<sup>a, b, \*</sup>

<sup>a</sup> NHC Key Laboratory of Systems Biology of Pathogens, Institute of Pathogen Biology, Chinese Academy of Medical Sciences & Peking Union Medical College, Beijing, 100730, China

<sup>b</sup> Key Laboratory of Respiratory Disease Pathogenomics, Chinese Academy of Medical Sciences & Peking Union Medical College, Beijing, 100730, China.

<sup>1</sup> Haoxiang Su, Yuyang Wang, and Yelin Han contributed equally to this work.

\* Corresponding Authors:

E-mail address: wuzq2009@ipbcams.ac.cn (Z. Wu); ymf129@163.com (F. Yang); zdsys@vip.sina.com (Q. Jin).

ORCID: 0000-0003-1139-3260 (Z. Wu).

**Figure S1** Network of haplotypes. Colored circles correspond to different hosts, and circle size is proportional to the number of sequences in the dataset. Small black circles represent ancestral or unsampled intermediate sequences. Branch length is proportional to the number of mutational steps between haplotypes. Only representatives of the L3 and the L4, with the seven species of *Jeilongvirus* in black are marked out.

**Figure S2** TMHMM posterior probabilities for *Jeilongvirus*. The x axial represents the amino acid length of the ORF, the y axial represents the posterior probability.

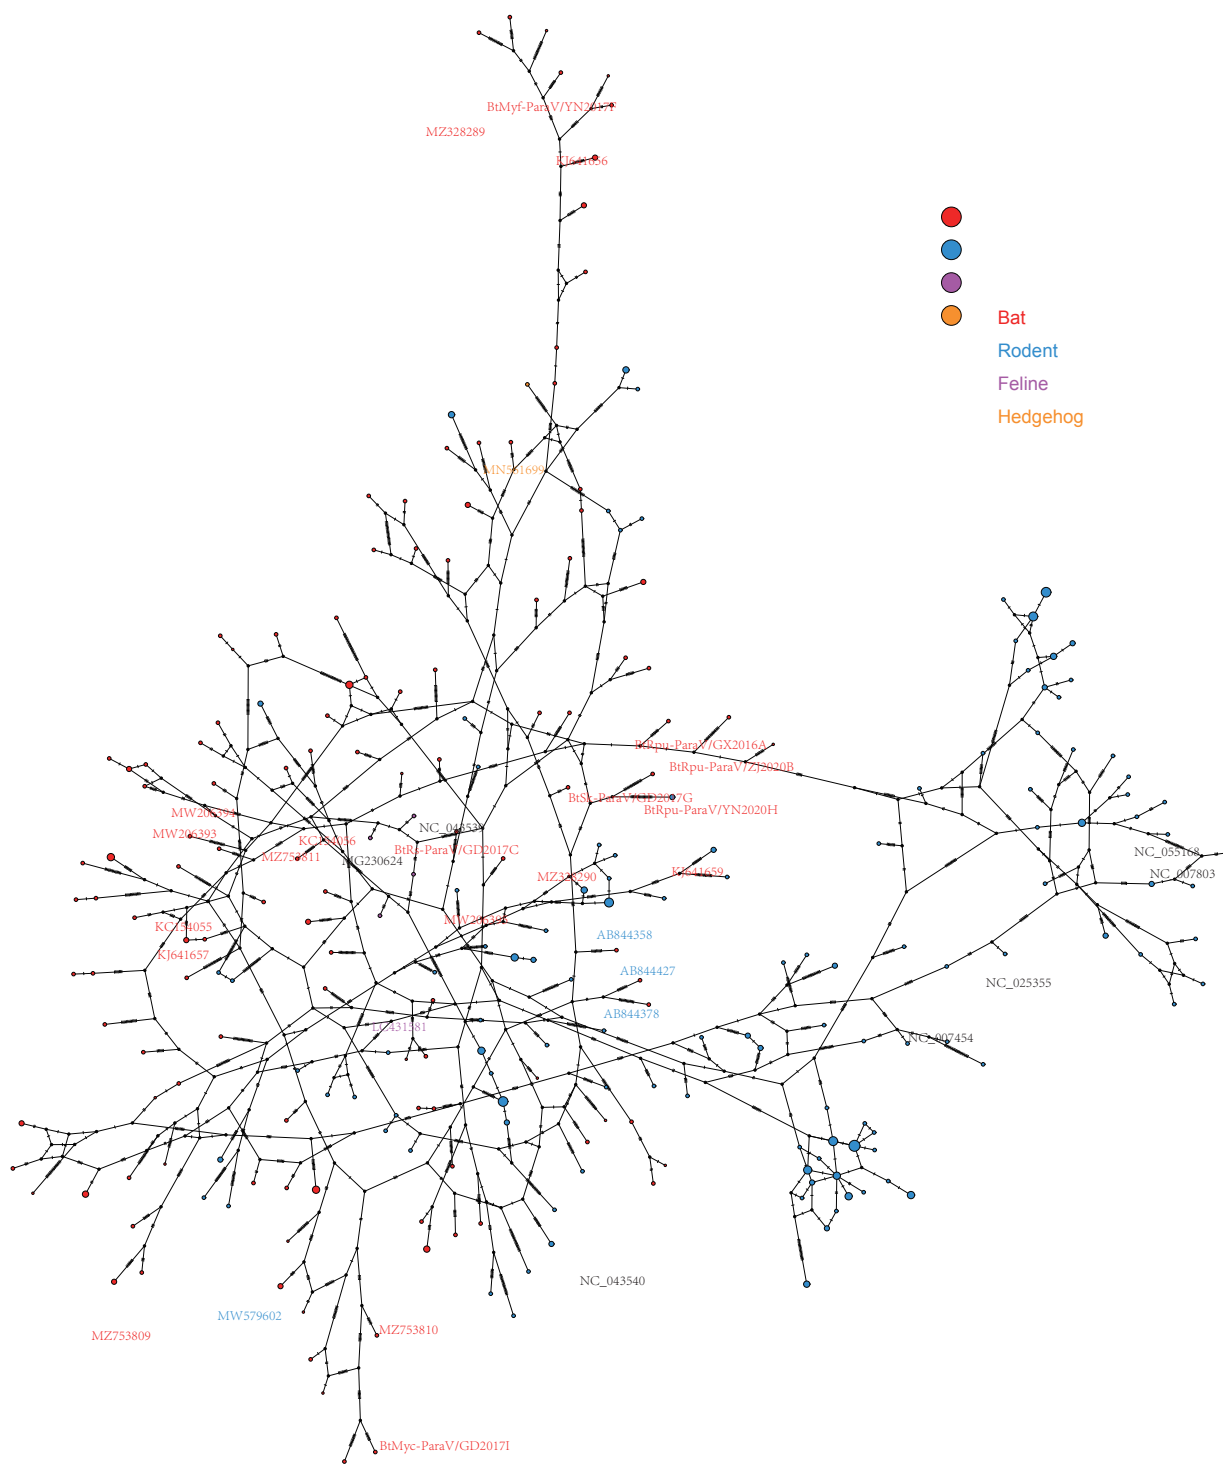

SH

TM

X

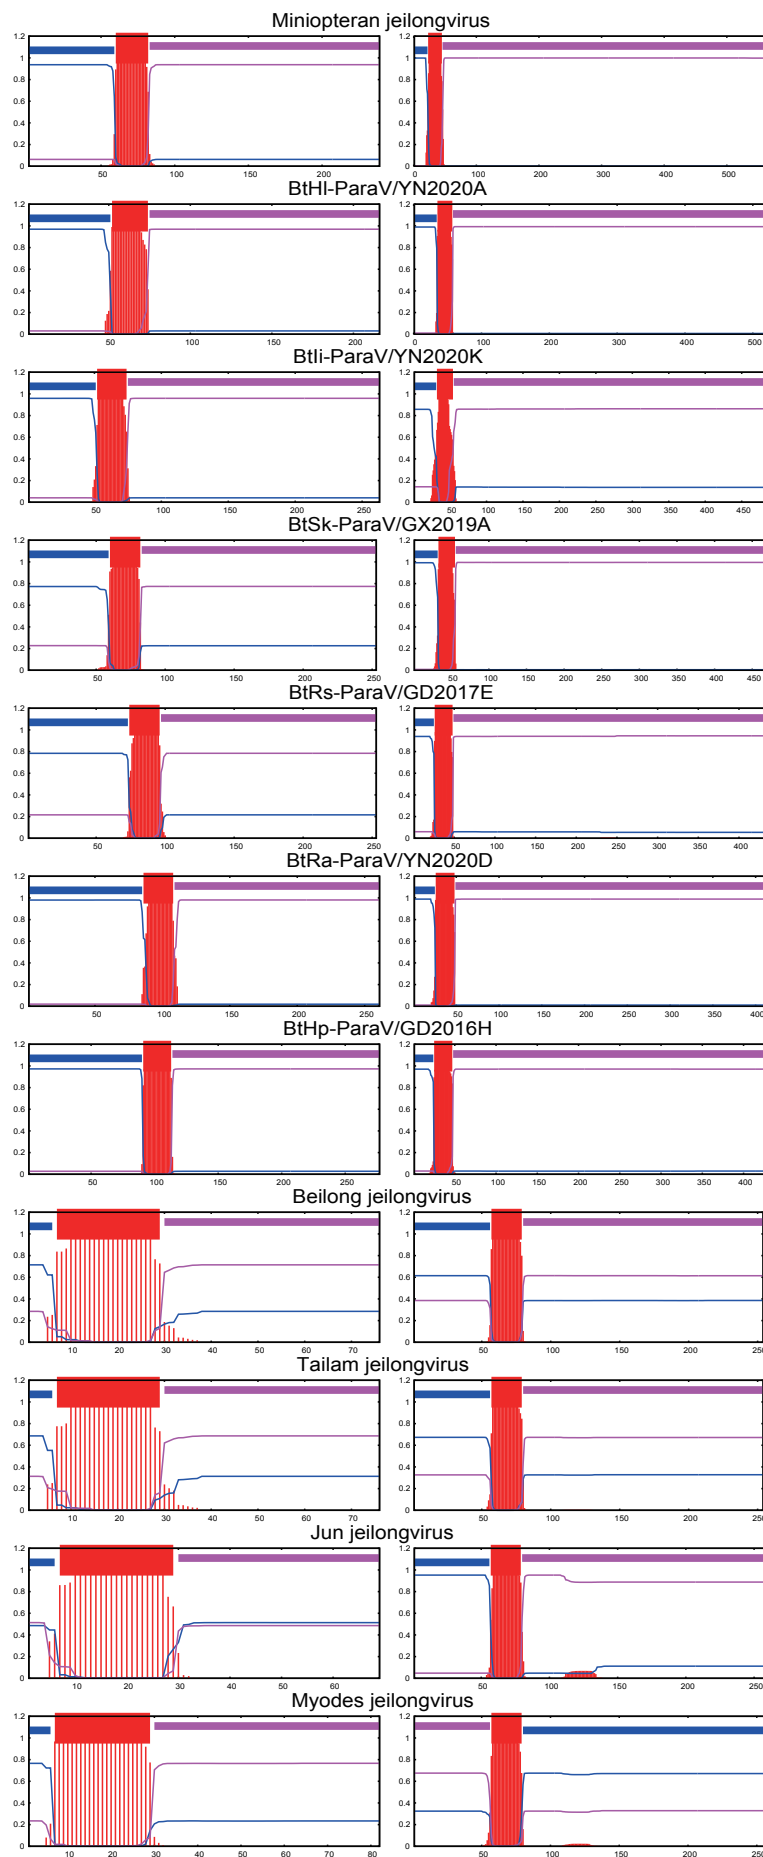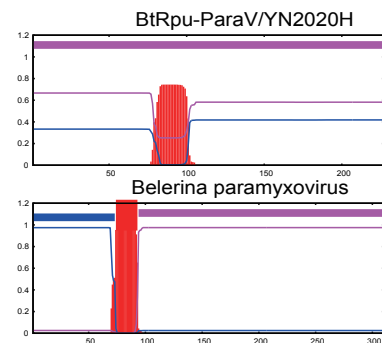

L3

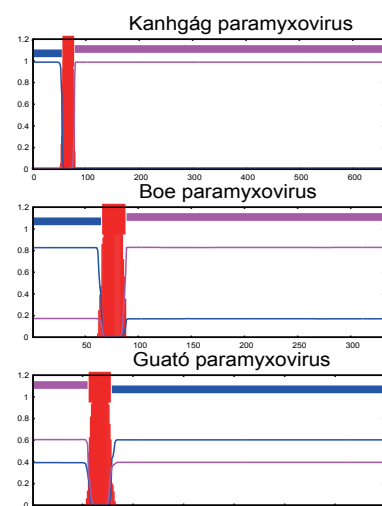

L4

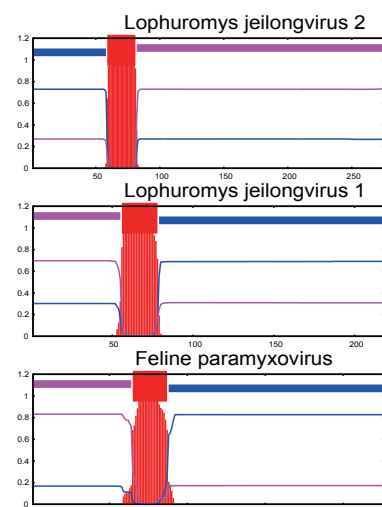

L1

L2

L2

transmembrane

inside

outside

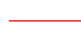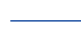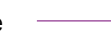

Table S1. 40 sequences obtained before in China

| Species                          | Year | Location  | Virus                                                                     | Fragment        | Length (bp) | Genus            | Accession |
|----------------------------------|------|-----------|---------------------------------------------------------------------------|-----------------|-------------|------------------|-----------|
| <i>Rousettus leschenaultii</i>   | 2006 | Guangdong | Tuhoko virus 1                                                            | Complete Genome | 15888       | Pararubulavirus  | NC_025410 |
| <i>Rousettus leschenaultii</i>   | 2006 | Guangdong | Tuhoko virus 2                                                            | Complete Genome | 15432       | Pararubulavirus  | NC_025348 |
| <i>Rousettus leschenaultii</i>   | 2006 | Guangdong | Tuhoko virus 3                                                            | Complete Genome | 15234       | Pararubulavirus  | NC_025350 |
| <i>Rhinolophus ferrumequinum</i> | 2010 | Yunnan    | Bat paramyxovirus isolate BtRf-ParaV-1/YN2010                             | Partial L       | 1468        | Jeilongvirus     | KJ641661  |
| <i>Rhinolophus ferrumequinum</i> | 2010 | Yunnan    | Bat paramyxovirus isolate BtRf-ParaV-2/YN2010                             | Partial L       | 547         | Jeilongvirus     | KJ641662  |
| <i>Miniopterus schreibersii</i>  | 2010 | Hainan    | Miniopterus schreibersii paramyxovirus isolate Bat Ms-ParaV/Hainan2010    | Partial M       | 334         | Jeilongvirus     | KC154059  |
| <i>Miniopterus schreibersii</i>  | 2011 | Shaanxi   | Miniopterus schreibersii paramyxovirus isolate Bat Ms-ParaV-1/Shaanxi2011 | Partial L       | 5286        | Jeilongvirus     | KC154055  |
| <i>Miniopterus schreibersii</i>  | 2011 | Shaanxi   | Miniopterus schreibersii paramyxovirus isolate Bat Ms-ParaV-2/Shaanxi2011 | Partial G, L    | 6273        | Jeilongvirus     | KC154056  |
| <i>Miniopterus schreibersii</i>  | 2011 | Anhui     | Miniopterus schreibersii paramyxovirus isolate Bat Ms-ParaV/Anhui2011     | Partial Genome  | 16017       | Jeilongvirus     | KC154054  |
| <i>Rhinolophus ferrumequinum</i> | 2011 | Shaanxi   | Rhinolophus ferrumequinum paramyxovirus isolate Bat Rf-ParaV/Shaanxi2011  | Partial M       | 727         | Jeilongvirus     | KC154057  |
| <i>Rhinolophus ferrumequinum</i> | 2011 | Shaanxi   | Rhinolophus ferrumequinum paramyxovirus isolate Bat Rf-ParaV/Shaanxi2011  | Partial L       | 529         | Jeilongvirus     | KC154058  |
| <i>Hipposideros armiger</i>      | 2012 | Guangdong | Bat paramyxovirus isolate BtHa-ParaV/GD2012                               | Partial Genome  | 14685       | Orthorubulavirus | KJ641654  |
| <i>Hipposideros pomona</i>       | 2012 | Guangdong | Bat paramyxovirus isolate BtHp-ParaV/GD2012                               | Partial L       | 4413        | Jeilongvirus     | KJ641655  |
| <i>Myotis daubentonii</i>        | 2012 | Liaoning  | Bat paramyxovirus isolate BtMd-ParaV/LN2012                               | Partial L       | 5361        | Jeilongvirus     | KJ641656  |
| <i>Eonycteris spelaea</i>        | 2012 | Yunnan    | Henipavirus YN12069/CHN/2012                                              | Partial L       | 612         | Henipavirus      | KC599257  |
| <i>Hipposideros cineraceus</i>   | 2012 | Yunnan    | Paramyxovirus YN12003/CHN/2012                                            | Partial L       | 617         | Jeilongvirus     | KC599255  |
| <i>Hipposideros armiger</i>      | 2012 | Yunnan    | Paramyxovirus YN12103/CHN/2012                                            | Partial L       | 565         | Jeilongvirus     | KC599258  |
| <i>Taphozous melanopogon</i>     | 2012 | Yunnan    | Paramyxovirus YN12162/CHN/2012                                            | Partial L       | 639         | Jeilongvirus     | KC599260  |
| <i>Taphozous melanopogon</i>     | 2012 | Yunnan    | Paramyxovirus YN12167D/CHN/2012                                           | Partial L       | 631         | Jeilongvirus     | KC599261  |
| <i>Taphozous melanopogon</i>     | 2012 | Yunnan    | Paramyxovirus YN12167X/CHN/2012                                           | Partial L       | 551         | Jeilongvirus     | KC599262  |
| <i>Taphozous melanopogon</i>     | 2012 | Yunnan    | Paramyxovirus YN12193D/CHN/2012                                           | Partial L       | 549         | Jeilongvirus     | KC599263  |
| <i>Taphozous melanopogon</i>     | 2012 | Yunnan    | Paramyxovirus YN12193X/CHN/2012                                           | Partial L       | 533         | Jeilongvirus     | KC599264  |
| <i>Rousettus leschenaultii</i>   | 2012 | Yunnan    | Rubulavirus YN12137/CHN/2012                                              | Partial L       | 562         | Pararubulavirus  | KC599259  |
| <i>Myotis blythii</i>            | 2013 | Gansu     | Bat paramyxovirus isolate BtMbly-ParaV/GS2013                             | Partial L       | 572         | Jeilongvirus     | KJ641653  |
| <i>Murina leucogaster</i>        | 2013 | Qinghai   | Bat paramyxovirus isolate BtMI-ParaV/QH2013                               | Partial Genome  | 14796       | Jeilongvirus     | KJ641657  |
| <i>Rhinolophus ferrumequinum</i> | 2013 | Shanxi    | Bat paramyxovirus isolate BtRf-ParaV/SX2013                               | Partial L       | 2670        | Orthorubulavirus | KJ641658  |
| <i>Rhinolophus hipposideros</i>  | 2013 | Tibet     | Bat paramyxovirus isolate BtRh-ParaV/Tibet2013                            | Partial L       | 4045        | Jeilongvirus     | KJ641660  |

|                                 |      |         |                                                         |                 |       |                  |          |
|---------------------------------|------|---------|---------------------------------------------------------|-----------------|-------|------------------|----------|
| <i>Vespertilio sinensis</i>     | 2013 | Sichuan | Bat paramyxovirus isolate BtVs-ParaV/SC2013             | Partial L       | 1549  | Jeilongvirus     | KJ641659 |
| <i>Murina leucogaster</i>       | 2013 | Jilin   | Bat paramyxovirus isolate JTA                           | Partial N, P    | 3257  | Orthorubulavirus | KX064232 |
| <i>Murina leucogaster</i>       | 2013 | Jilin   | Bat paramyxovirus isolate JTA                           | Partial L       | 2064  | Orthorubulavirus | KX343068 |
| unclassified Chiroptera         | 2014 | Guangxi | Avian orthoavulavirus 1 strain Ba/CH/LGX/1141/2014      | Complete Genome | 15198 | Orthoavulavirus  | MK327606 |
| unclassified Chiroptera         | 2014 | Guangxi | Avian orthoavulavirus 1 strain Ba/CH/LGX/1142/2014      | Complete Genome | 15198 | Orthoavulavirus  | MK327607 |
| unclassified Chiroptera         | 2014 | Guangxi | Avian orthoavulavirus 1 strain Ba/CH/LGX/421/2014       | Complete Genome | 15198 | Orthoavulavirus  | MK327604 |
| unclassified Chiroptera         | 2014 | Guangxi | Avian orthoavulavirus 1 strain Ba/CH/LGX/426/2014       | Complete Genome | 15198 | Orthoavulavirus  | MK327605 |
| <i>Rhinolophus pusillus</i>     | 2015 | Macao   | Bat paramyxovirus isolate LJ465                         | Partial L       | 531   | Jeilongvirus     | KY783905 |
| <i>Miniopterus schreibersii</i> | 2016 | Macao   | Bat paramyxovirus isolate 160228                        | Partial L       | 531   | Jeilongvirus     | KY783904 |
| <i>Miniopterus schreibersii</i> | 2016 | Hubei   | Jingmen <i>Miniopterus schreibersii</i> paramyxovirus 1 | Complete Genome | 17673 | Jeilongvirus     | MZ328288 |
| <i>Miniopterus schreibersii</i> | 2016 | Hubei   | Jingmen <i>Miniopterus schreibersii</i> paramyxovirus 2 | Partial Genome  | 14389 | Jeilongvirus     | MZ328289 |
| <i>Rhinolophus pearsonii</i>    | 2016 | Hubei   | Wufeng <i>Rhinolophus pearsonii</i> paramyxovirus 1     | Complete Genome | 16128 | Jeilongvirus     | MZ328290 |
| <i>Hipposideros armiger</i>     | 2021 | Hainan  | Bat paramyxovirus HaParaV                               | Complete Genome | 18095 | Jeilongvirus     | OL630969 |

**Table S2.** 94 sequences obtained in this study

| Species                         | Year | Location  | Strain Name | Upload ID           | Fragment               | Length (bp) |
|---------------------------------|------|-----------|-------------|---------------------|------------------------|-------------|
| <i>Rhinolophus sinicus</i>      | 2016 | Guangdong | GD2016A     | BtRs-ParaV/GD2016A  | Partial L              | 564         |
| <i>Rhinolophus sinicus</i>      | 2016 | Guangdong | GD2016B     | BtRs-ParaV/GD2016B  | Partial L              | 1147        |
| <i>Rhinolophus sinicus</i>      | 2016 | Guangdong | GD2016C     | BtRs-ParaV/GD2016C  | Partial L              | 1296        |
| <i>Rhinolophus sinicus</i>      | 2016 | Guangdong | GD2016D     | BtRs-ParaV/GD2016D  | Partial L              | 1447        |
| <i>Rhinolophus sinicus</i>      | 2016 | Guangdong | GD2016E     | BtRs-ParaV/GD2016E  | Partial L              | 6462        |
| <i>Miniopterus pusillus</i>     | 2016 | Guangdong | GD2016F     | BtMp-ParaV/GD2016F  | Partial L              | 574         |
| <i>Hipposideros pomona</i>      | 2016 | Guangdong | GD2016G     | BtHp-ParaV/GD2016G  | Partial Genome         | 16908       |
| <i>Hipposideros pomona</i>      | 2016 | Guangdong | GD2016H     | BtHp-ParaV/GD2016H  | Complete CDS           | 17145       |
| <i>Miniopterus schreibersii</i> | 2016 | Guangdong | GD2016I     | BtMs-ParaV/GD2016I  | Complete CDS           | 17574       |
| <i>Hipposideros pratti</i>      | 2016 | Guangdong | GD2016J     | BtHpr-ParaV/GD2016J | Partial L              | 561         |
| <i>Rhinolophus pusillus</i>     | 2016 | Guangxi   | GX2016A     | BtRpu-ParaV/GX2016A | Partial L              | 1303        |
| <i>Rhinolophus sinicus</i>      | 2016 | Guangxi   | GX2016B     | BtRs-ParaV/GX2016B  | Partial Genome         | 16799       |
| <i>Hipposideros pomona</i>      | 2016 | Guangxi   | GX2016C     | BtHp-ParaV/GX2016C  | Partial P, M           | 1575        |
| <i>Hipposideros pomona</i>      | 2016 | Guangxi   | GX2016D     | BtHp-ParaV/GX2016D  | Partial G, L           | 5118        |
| <i>Hipposideros pomona</i>      | 2016 | Guangxi   | GX2016E     | BtHp-ParaV/GX2016E  | Partial L              | 1995        |
| <i>Myotis siligorensis</i>      | 2016 | Guangxi   | GX2016F     | BtMys-ParaV/GX2016F | Partial L              | 510         |
| <i>Rhinolophus sinicus</i>      | 2016 | Yunnan    | YN2016A     | BtRs-ParaV/YN2016A  | Partial L              | 1010        |
| <i>Rhinolophus affinis</i>      | 2016 | Yunnan    | YN2016B     | BtRa-ParaV/YN2016B  | Partial G, L           | 6841        |
| <i>Myotis ricketti</i>          | 2016 | Yunnan    | YN2016C     | BtMyr-ParaV/YN2016C | Partial L              | 617         |
| <i>Ia io</i>                    | 2016 | Yunnan    | YN2016D     | BtIi-ParaV/YN2016D  | Complete CDS           | 18137       |
| <i>Rhinolophus sinicus</i>      | 2017 | Guangdong | GD2017A     | BtRs-ParaV/GD2017A  | Partial G, L           | 1095        |
| <i>Rhinolophus sinicus</i>      | 2017 | Guangdong | GD2017B     | BtRs-ParaV/GD2017B  | Partial L              | 781         |
| <i>Rhinolophus sinicus</i>      | 2017 | Guangdong | GD2017C     | BtRs-ParaV/GD2017C  | Partial L              | 1311        |
| <i>Rhinolophus sinicus</i>      | 2017 | Guangdong | GD2017D     | BtRs-ParaV/GD2017D  | Partial G, L           | 2642        |
| <i>Rhinolophus sinicus</i>      | 2017 | Guangdong | GD2017E     | BtRs-ParaV/GD2017E  | Complete CDS           | 16719       |
| <i>Rhinolophus affinis</i>      | 2017 | Guangdong | GD2017F     | BtRa-ParaV/GD2017F  | Partial L              | 553         |
| <i>Scotophilus kuhlii</i>       | 2017 | Guangdong | GD2017G     | BtSk-ParaV/GD2017G  | Partial G, L           | 7077        |
| <i>Myotis chinensis</i>         | 2017 | Guangdong | GD2017H     | BtMyc-ParaV/GD2017H | Partial N, P, M, F, SH | 5489        |
| <i>Myotis chinensis</i>         | 2017 | Guangdong | GD2017I     | BtMyc-ParaV/GD2017I | Partial L              | 5868        |
| <i>Rhinolophus affinis</i>      | 2017 | Guangxi   | GX2017A     | BtRa-ParaV/GX2017A  | Partial L              | 589         |
| <i>Rhinolophus macrotis</i>     | 2017 | Guangxi   | GX2017B     | BtRm-ParaV/GX2017B  | Partial F, SH          | 1724        |
| <i>Rhinolophus macrotis</i>     | 2017 | Guangxi   | GX2017C     | BtRm-ParaV/GX2017C  | Partial G              | 802         |
| <i>Scotophilus kuhlii</i>       | 2017 | Guangxi   | GX2017D     | BtSk-ParaV/GX2017D  | Partial TM, G          | 3145        |
| <i>Scotophilus kuhlii</i>       | 2017 | Guangxi   | GX2017E     | BtSk-ParaV/GX2017E  | Partial L              | 3059        |
| <i>Hipposideros larvatus</i>    | 2017 | Guangxi   | GX2017F     | BtHl-ParaV/GX2017F  | Partial N, P, M, F     | 5904        |
| <i>Hipposideros larvatus</i>    | 2017 | Guangxi   | GX2017G     | BtHl-ParaV/GX2017G  | Partial TM, G, L       | 10602       |
| <i>Hipposideros larvatus</i>    | 2017 | Guangxi   | GX2017H     | BtHl-ParaV/GX2017H  | Partial N, P, M, F     | 5697        |
| <i>Hipposideros larvatus</i>    | 2017 | Guangxi   | GX2017I     | BtHl-ParaV/GX2017I  | Partial G, L           | 8613        |
| <i>Hipposideros larvatus</i>    | 2017 | Guangxi   | GX2017J     | BtHl-ParaV/GX2017J  | Partial L              | 975         |
| <i>Hipposideros larvatus</i>    | 2017 | Guangxi   | GX2017K     | BtHl-ParaV/GX2017K  | Complete CDS           | 17922       |
| <i>Myotis ricketti</i>          | 2017 | Guangxi   | GX2017L     | BtMyr-ParaV/GX2017L | Partial L              | 279         |
| <i>Myotis siligorensis</i>      | 2017 | Guangxi   | GX2017M     | BtMys-ParaV/GX2017M | Partial Genome         | 10944       |
| <i>Myotis siligorensis</i>      | 2017 | Guangxi   | GX2017N     | BtMys-ParaV/GX2017N | Partial L              | 4347        |
| <i>Eonycteris spelaea</i>       | 2017 | Yunnan    | YN2017A     | BtEsp-ParaV/YN2017A | Partial P              | 336         |
| <i>Aselliscus stoliczkanus</i>  | 2017 | Yunnan    | YN2017B     | BtAs-ParaV/YN2017B  | Partial L              | 1626        |
| <i>Aselliscus stoliczkanus</i>  | 2017 | Yunnan    | YN2017C     | BtAs-ParaV/YN2017C  | Partial G, L           | 8645        |
| <i>Megaderma lyra</i>           | 2017 | Yunnan    | YN2017D     | BtMl-ParaV/YN2017D  | Partial L              | 477         |
| <i>Myotis fimbriatus</i>        | 2017 | Yunnan    | YN2017E     | BtMyf-ParaV/YN2017E | Partial P, M           | 1518        |
| <i>Myotis fimbriatus</i>        | 2017 | Yunnan    | YN2017F     | BtMyf-ParaV/YN2017F | Partial L              | 999         |
| <i>Myotis fimbriatus</i>        | 2017 | Yunnan    | YN2017G     | BtMyf-017G          | Partial L              | 1020        |
| <i>Rhinolophus sinicus</i>      | 2018 | Guangdong | GD2018A     | BtRs-ParaV/GD2018A  | Partial Genome         | 16789       |
| <i>Rhinolophus affinis</i>      | 2018 | Guangdong | GD2018B     | BtRa-ParaV/GD2018B  | Partial L              | 562         |
| <i>Scotophilus kuhlii</i>       | 2018 | Guangdong | GD2018C     | BtSk-ParaV/GD2018C  | Partial M, F           | 1987        |
| <i>Scotophilus kuhlii</i>       | 2018 | Guangdong | GD2018D     | BtSk-ParaV/GD2018D  | Partial L              | 588         |
| <i>Scotophilus kuhlii</i>       | 2018 | Guangdong | GD2018E     | BtSk-ParaV/GD2018E  | Partial G, L           | 8354        |
| <i>Hipposideros larvatus</i>    | 2018 | Guangdong | GD2018F     | BtHl-ParaV/GD2018F  | Partial G, L           | 8703        |
| <i>Rhinolophus sinicus</i>      | 2019 | Guangdong | GD2019A     | BtRs-ParaV/GD2019A  | Partial N, P, M, F     | 5443        |
| <i>Rhinolophus sinicus</i>      | 2019 | Guangdong | GD2019B     | BtRs-ParaV/GD2019B  | Partial L              | 2740        |
| <i>Rhinolophus sinicus</i>      | 2019 | Guangdong | GD2019C     | BtRs-ParaV/GD2019C  | Partial L              | 1455        |
| <i>Rhinolophus affinis</i>      | 2019 | Guangdong | GD2019D     | BtRa-ParaV/GD2019D  | Complete CDS           | 16726       |

|                                  |      |           |         |                     |                               |       |
|----------------------------------|------|-----------|---------|---------------------|-------------------------------|-------|
| <i>Rhinolophus pearsonii</i>     | 2019 | Guangdong | GD2019E | BtRpe-ParaV/GD2019E | Partial L                     | 548   |
| <i>Hipposideros larvatus</i>     | 2019 | Guangdong | GD2019F | BtHI-ParaV/GD2019F  | Partial L                     | 2441  |
| <i>Scotophilus kuhlii</i>        | 2019 | Guangxi   | GX2019A | BtSk-ParaV/GX2019A  | Complete CDS                  | 18452 |
| <i>Scotophilus kuhlii</i>        | 2019 | Hainan    | HI2019A | BtSk-ParaV/HI2019A  | Partial L                     | 569   |
| <i>Scotophilus kuhlii</i>        | 2019 | Hainan    | HI2019B | BtSk-ParaV/HI2019B  | Partial L                     | 2070  |
| <i>Scotophilus kuhlii</i>        | 2019 | Hainan    | HI2019C | BtSk-ParaV/HI2019C  | Partial N, P                  | 1566  |
| <i>Scotophilus kuhlii</i>        | 2019 | Hainan    | HI2019D | BtSk-ParaV/HI2019D  | Partial G, L                  | 1846  |
| <i>Scotophilus kuhlii</i>        | 2019 | Hainan    | HI2019E | BtSk-ParaV/HI2019E  | Partial L                     | 3201  |
| <i>Rhinolophus affinis</i>       | 2019 | Hainan    | HI2019F | BtRa-ParaV/HI2019F  | Partial L                     | 561   |
| <i>Rhinolophus affinis</i>       | 2019 | Hainan    | HI2019G | BtRa-ParaV/HI2019G  | Partial L                     | 562   |
| <i>Hipposideros larvatus</i>     | 2019 | Hainan    | HI2019H | BtHI-ParaV/HI2019H  | Complete CDS                  | 17922 |
| <i>Hipposideros pomona</i>       | 2019 | Hainan    | HI2019I | BtHp-ParaV/HI2019I  | Partial L                     | 567   |
| <i>Miniopterus schreibersii</i>  | 2019 | Hainan    | HI2019J | BtMs-ParaV/HI2019J  | Complete CDS                  | 17569 |
| <i>Rhinolophus affinis</i>       | 2020 | Hubei     | HB2020A | BtRa-ParaV/HB2020A  | Partial Genome                | 13746 |
| <i>Rhinolophus affinis</i>       | 2020 | Hubei     | HB2020B | BtRa-ParaV/HB2020B  | Partial N, P, M, F            | 4761  |
| <i>Rhinolophus affinis</i>       | 2020 | Hubei     | HB2020C | BtRa-ParaV/HB2020C  | Partial TM, G, L              | 9873  |
| <i>Myotis adversus</i>           | 2020 | Jiangxi   | JX2020A | BtMya-ParaV/JX2020A | Partial L                     | 722   |
| <i>Eptesicus serotinus</i>       | 2020 | Jiangxi   | JX2020B | BtEse-ParaV/JX2020B | Partial N, P, M               | 4467  |
| <i>Eptesicus serotinus</i>       | 2020 | Jiangxi   | JX2020C | BtEse-ParaV/JX2020C | Partial F, SH, TM, G, L       | 12904 |
| <i>Hipposideros larvatus</i>     | 2020 | Yunnan    | YN2020A | BtHI-ParaV/YN2020A  | Complete Genome               | 18150 |
| <i>Rhinolophus affinis</i>       | 2020 | Yunnan    | YN2020B | BtRa-ParaV/YN2020B  | Partial N, P, M, F, SH, TM    | 7348  |
| <i>Rhinolophus affinis</i>       | 2020 | Yunnan    | YN2020C | BtRa-ParaV/YN2020C  | Partial G, L                  | 3177  |
| <i>Rhinolophus affinis</i>       | 2020 | Yunnan    | YN2020D | BtRa-ParaV/YN2020D  | Complete CDS                  | 16647 |
| <i>Rhinolophus sinicus</i>       | 2020 | Yunnan    | YN2020E | BtRs-ParaV/YN2020E  | Partial Genome                | 16356 |
| <i>Hipposideros pomona</i>       | 2020 | Yunnan    | YN2020F | BtHp-ParaV/YN2020F  | Partial M, F                  | 1849  |
| <i>Hipposideros pomona</i>       | 2020 | Yunnan    | YN2020G | BtHp-ParaV/YN2020G  | Partial G, L                  | 6996  |
| <i>Rhinolophus pusillus</i>      | 2020 | Yunnan    | YN2020H | BtRpu-ParaV/YN2020H | Complete Genome               | 16038 |
| <i>Miniopterus schreibersii</i>  | 2020 | Yunnan    | YN2020I | BtMs-ParaV/YN2020I  | Partial L                     | 992   |
| <i>Rhinolophus pearsonii</i>     | 2020 | Yunnan    | YN2020J | BtRpe-ParaV/YN2020J | Partial L                     | 573   |
| <i>Ia io</i>                     | 2020 | Yunnan    | YN2020K | BtIi-ParaV/YN2020K  | Complete CDS                  | 18147 |
| <i>Aselliscus stoliczkanus</i>   | 2020 | Yunnan    | YN2020L | BtAs-ParaV/YN2020L  | Partial L                     | 586   |
| <i>Rhinolophus pusillus</i>      | 2020 | Zhejiang  | ZJ2020A | BtRpu-ParaV/ZJ2020A | Partial N                     | 1254  |
| <i>Rhinolophus pusillus</i>      | 2020 | Zhejiang  | ZJ2020B | BtRpu-ParaV/ZJ2020B | Partial P, M, F, SH, TM, G, L | 13135 |
| <i>Rhinolophus ferrumequinum</i> | 2020 | Zhejiang  | ZJ2020C | BtRf-ParaV/ZJ2020C  | Partial L                     | 3404  |



**Table S3. Host switches**

| <b>From</b>         | <b>To</b>           | <b>Bayesian Factors</b> | <b>Posterior Probability</b> |
|---------------------|---------------------|-------------------------|------------------------------|
| <i>Murina</i>       | <i>Desmodus</i>     | 1080.78                 | 0.99                         |
| <i>Aselliscus</i>   | <i>Desmodus</i>     | 56.49                   | 0.80                         |
| <i>Rattus</i>       | <i>Scotophilus</i>  | 27.33                   | 0.66                         |
| <i>Vespertilio</i>  | <i>Desmodus</i>     | 21.58                   | 0.60                         |
| <i>Desmodus</i>     | <i>Neotoma</i>      | 19.64                   | 0.58                         |
| <i>Mus</i>          | <i>Murina</i>       | 18.74                   | 0.57                         |
| <i>Taphozous</i>    | <i>Murina</i>       | 16.76                   | 0.54                         |
| <i>Ia</i>           | <i>Maxomys</i>      | 10.83                   | 0.43                         |
| <i>Scotophilus</i>  | <i>Felis</i>        | 10.70                   | 0.43                         |
| <i>Mus</i>          | <i>Myodes</i>       | 10.12                   | 0.42                         |
| <i>Apodemus</i>     | <i>Macrotus</i>     | 9.97                    | 0.41                         |
| <i>Eptesicus</i>    | <i>Ia</i>           | 9.45                    | 0.40                         |
| <i>Carollia</i>     | <i>Chaetodipus</i>  | 8.82                    | 0.38                         |
| <i>Scotophilus</i>  | <i>Erinaceus</i>    | 8.47                    | 0.37                         |
| <i>Miniopterus</i>  | <i>Chaetodipus</i>  | 8.11                    | 0.36                         |
| <i>Scotophilus</i>  | <i>Carollia</i>     | 7.20                    | 0.34                         |
| <i>Erinaceus</i>    | <i>Chaetodipus</i>  | 6.56                    | 0.32                         |
| <i>Felis</i>        | <i>Chaetodipus</i>  | 6.50                    | 0.31                         |
| <i>Chaetodipus</i>  | <i>Macrotus</i>     | 6.45                    | 0.31                         |
| <i>Taphozous</i>    | <i>Myodes</i>       | 6.41                    | 0.31                         |
| <i>Mastomys</i>     | <i>Miniopterus</i>  | 5.75                    | 0.29                         |
| <i>Myotis</i>       | <i>Murina</i>       | 5.69                    | 0.29                         |
| <i>Antrozous</i>    | <i>Tadarida</i>     | 5.69                    | 0.29                         |
| <i>Aselliscus</i>   | <i>Vespertilio</i>  | 5.56                    | 0.28                         |
| <i>Taphozous</i>    | <i>Bandicota</i>    | 5.51                    | 0.28                         |
| <i>Murina</i>       | <i>Myodes</i>       | 5.42                    | 0.28                         |
| <i>Lophuromys</i>   | <i>Desmodus</i>     | 5.31                    | 0.27                         |
| <i>Mus</i>          | <i>Taphozous</i>    | 5.03                    | 0.26                         |
| <i>Scotophilus</i>  | <i>Macrotus</i>     | 4.98                    | 0.26                         |
| <i>Myotis</i>       | <i>Bandicota</i>    | 4.89                    | 0.26                         |
| <i>Mastomys</i>     | <i>Chaetodipus</i>  | 4.75                    | 0.25                         |
| <i>Eptesicus</i>    | <i>Maxomys</i>      | 4.72                    | 0.25                         |
| <i>Hipposideros</i> | <i>Pteronotus</i>   | 4.71                    | 0.25                         |
| <i>Pteronotus</i>   | <i>Tadarida</i>     | 4.56                    | 0.24                         |
| <i>Rhinolophus</i>  | <i>Bandicota</i>    | 4.56                    | 0.24                         |
| <i>Rattus</i>       | <i>Rhinolophus</i>  | 4.45                    | 0.24                         |
| <i>Myotis</i>       | <i>Sciurus</i>      | 4.43                    | 0.24                         |
| <i>Myotis</i>       | <i>Chaetodipus</i>  | 4.43                    | 0.24                         |
| <i>Felis</i>        | <i>Erinaceus</i>    | 4.38                    | 0.24                         |
| <i>Apodemus</i>     | <i>Tadarida</i>     | 4.36                    | 0.24                         |
| <i>Mus</i>          | <i>Hipposideros</i> | 4.31                    | 0.23                         |
| <i>Sikkim</i>       | <i>Chaetodipus</i>  | 4.28                    | 0.23                         |
| <i>Hipposideros</i> | <i>Taphozous</i>    | 4.03                    | 0.22                         |
| <i>Myodes</i>       | <i>Desmodus</i>     | 4.01                    | 0.22                         |
| <i>Taphozous</i>    | <i>Tadarida</i>     | 3.72                    | 0.21                         |
| <i>Ia</i>           | <i>Macrotus</i>     | 3.51                    | 0.20                         |
| <i>Ia</i>           | <i>Sciurus</i>      | 3.49                    | 0.20                         |
| <i>Taphozous</i>    | <i>Maxomys</i>      | 3.49                    | 0.20                         |
| <i>Mus</i>          | <i>Miniopterus</i>  | 3.45                    | 0.20                         |
| <i>Murina</i>       | <i>Bandicota</i>    | 3.43                    | 0.20                         |
| <i>Felis</i>        | <i>Carollia</i>     | 3.39                    | 0.19                         |
| <i>Bandicota</i>    | <i>Antrozous</i>    | 3.36                    | 0.19                         |
| <i>Vespertilio</i>  | <i>Lophuromys</i>   | 3.32                    | 0.19                         |
| <i>Scotophilus</i>  | <i>Murina</i>       | 3.26                    | 0.19                         |
| <i>Murina</i>       | <i>Tadarida</i>     | 3.19                    | 0.18                         |
| <i>Scotophilus</i>  | <i>Chaetodipus</i>  | 3.19                    | 0.18                         |
| <i>Mastomys</i>     | <i>Scotophilus</i>  | 3.19                    | 0.18                         |
| <i>Sikkim</i>       | <i>Pteronotus</i>   | 3.13                    | 0.18                         |
| <i>Lophuromys</i>   | <i>Macrotus</i>     | 3.10                    | 0.18                         |
| <i>Hipposideros</i> | <i>Sikkim</i>       | 3.09                    | 0.18                         |
| <i>Mus</i>          | <i>Vespertilio</i>  | 3.09                    | 0.18                         |
| <i>Hipposideros</i> | <i>Myotis</i>       | 3.04                    | 0.18                         |
| <i>Myodes</i>       | <i>Lophuromys</i>   | 3.04                    | 0.18                         |
| <i>Neotoma</i>      | <i>Tadarida</i>     | 3.03                    | 0.18                         |
| <i>Vespertilio</i>  | <i>Bandicota</i>    | 3.01                    | 0.18                         |

Table S4. Region switches

| From           | To             | Bayesian Factors | Posterior Probability |
|----------------|----------------|------------------|-----------------------|
| HB, China      | Tanzania       | 177444.02        | 1.00                  |
| ZJ, China      | Tanzania       | 177444.02        | 1.00                  |
| AH, China      | United Kingdom | 12659.58         | 1.00                  |
| United Kingdom | Brazil         | 138.03           | 0.90                  |
| GD, China      | Belgium        | 81.36            | 0.83                  |
| SN, China      | LN, China      | 81.09            | 0.83                  |
| Thailand       | Tanzania       | 80.93            | 0.83                  |
| AH, China      | Tanzania       | 80.56            | 0.83                  |
| Mozambique     | Brazil         | 57.42            | 0.78                  |
| HB, China      | AH, China      | 57.18            | 0.78                  |
| YN, China      | HI, China      | 57.09            | 0.78                  |
| JX, China      | QH, China      | 57.03            | 0.78                  |
| HK, China      | Comoros        | 57.03            | 0.78                  |
| United Kingdom | USA            | 56.79            | 0.78                  |
| ZJ, China      | Thailand       | 56.64            | 0.78                  |
| South Korea    | Thailand       | 32.55            | 0.67                  |
| Zambia         | Germany        | 32.54            | 0.67                  |
| GD, China      | HB, China      | 27.31            | 0.63                  |
| SN, China      | United Kingdom | 25.72            | 0.61                  |
| YN, China      | Germany        | 25.67            | 0.61                  |
| United Kingdom | XZ, China      | 25.67            | 0.61                  |
| SC, China      | USA            | 25.67            | 0.61                  |
| YN, China      | Tanzania       | 25.66            | 0.61                  |
| LN, China      | USA            | 25.66            | 0.61                  |
| GX, China      | Slovenia       | 25.65            | 0.61                  |
| HK, China      | LN, China      | 25.65            | 0.61                  |
| QH, China      | Japan          | 25.65            | 0.61                  |
| SC, China      | Kenya          | 25.65            | 0.61                  |
| Madagascar     | South Korea    | 25.65            | 0.61                  |
| Zimbabwe       | Mozambique     | 25.64            | 0.61                  |
| Germany        | Comoros        | 25.63            | 0.61                  |
| GD, China      | French Guiana  | 25.62            | 0.61                  |
| South Korea    | Tanzania       | 25.61            | 0.61                  |
| JX, China      | ZJ, China      | 25.60            | 0.61                  |
| GD, China      | United Kingdom | 25.60            | 0.61                  |
| Comoros        | Madagascar     | 25.60            | 0.61                  |
| Australia      | Comoros        | 25.60            | 0.61                  |
| YN, China      | Japan          | 25.60            | 0.61                  |
| GD, China      | Cambodia       | 25.60            | 0.61                  |
| XZ, China      | Slovenia       | 25.60            | 0.61                  |
| Tanzania       | USA            | 25.60            | 0.61                  |
| Zambia         | United Kingdom | 25.58            | 0.61                  |
| HK, China      | QH, China      | 25.58            | 0.61                  |
| GD, China      | Mozambique     | 25.57            | 0.61                  |
| GX, China      | HB, China      | 25.57            | 0.61                  |
| HI, China      | South Korea    | 25.56            | 0.61                  |
| JX, China      | South Korea    | 25.56            | 0.61                  |
| GD, China      | Tanzania       | 25.56            | 0.61                  |
| HI, China      | USA            | 25.55            | 0.61                  |
| NX, China      | Slovenia       | 25.55            | 0.61                  |
| ZJ, China      | SN, China      | 25.53            | 0.61                  |
| GD, China      | Brazil         | 25.49            | 0.61                  |
| Zambia         | Thailand       | 20.95            | 0.56                  |
| JX, China      | GX, China      | 8.02             | 0.33                  |
| XZ, China      | NX, China      | 7.78             | 0.33                  |
| HB, China      | South Korea    | 5.06             | 0.24                  |
| JX, China      | HI, China      | 4.61             | 0.22                  |
| HB, China      | ZJ, China      | 4.61             | 0.22                  |
| Zambia         | AH, China      | 4.59             | 0.22                  |
| JX, China      | HB, China      | 3.51             | 0.18                  |
| Germany        | Madagascar     | 3.26             | 0.17                  |
| HB, China      | USA            | 3.25             | 0.17                  |
| Slovenia       | French Guiana  | 3.25             | 0.17                  |
| Zambia         | HI, China      | 3.25             | 0.17                  |
| HI, China      | Thailand       | 3.24             | 0.17                  |
| SC, China      | Japan          | 3.24             | 0.17                  |
| Belgium        | Brazil         | 3.24             | 0.17                  |
| Australia      | SN, China      | 3.24             | 0.17                  |
| Germany        | Mozambique     | 3.24             | 0.17                  |
| GD, China      | HI, China      | 3.24             | 0.17                  |
| GX, China      | XZ, China      | 3.24             | 0.17                  |
| QH, China      | SC, China      | 3.24             | 0.17                  |
| Australia      | South Korea    | 3.24             | 0.17                  |

|                |                |      |      |
|----------------|----------------|------|------|
| HB, China      | NX, China      | 3.23 | 0.17 |
| NX, China      | French Guiana  | 3.23 | 0.17 |
| Zimbabwe       | Thailand       | 3.23 | 0.17 |
| Thailand       | Brazil         | 3.23 | 0.17 |
| GX, China      | HI, China      | 3.23 | 0.17 |
| Australia      | HB, China      | 3.23 | 0.17 |
| HB, China      | SC, China      | 3.23 | 0.17 |
| AH, China      | SN, China      | 3.23 | 0.17 |
| SC, China      | Comoros        | 3.23 | 0.17 |
| Slovenia       | Cambodia       | 3.23 | 0.17 |
| Comoros        | HI, China      | 3.23 | 0.17 |
| NX, China      | Kenya          | 3.23 | 0.17 |
| Zambia         | Madagascar     | 3.23 | 0.17 |
| YN, China      | GX, China      | 3.23 | 0.17 |
| JX, China      | LN, China      | 3.23 | 0.17 |
| Japan          | Thailand       | 3.23 | 0.17 |
| GD, China      | USA            | 3.23 | 0.17 |
| Germany        | Zimbabwe       | 3.23 | 0.17 |
| South Korea    | Slovenia       | 3.22 | 0.17 |
| HI, China      | HB, China      | 3.22 | 0.17 |
| Zambia         | Slovenia       | 3.22 | 0.17 |
| JX, China      | Mozambique     | 3.22 | 0.17 |
| SN, China      | Comoros        | 3.22 | 0.17 |
| LN, China      | NX, China      | 3.22 | 0.17 |
| Australia      | GD, China      | 3.22 | 0.17 |
| HB, China      | Kenya          | 3.22 | 0.17 |
| ZJ, China      | Mozambique     | 3.22 | 0.17 |
| LN, China      | Comoros        | 3.22 | 0.17 |
| LN, China      | Thailand       | 3.22 | 0.17 |
| QH, China      | XZ, China      | 3.22 | 0.17 |
| Japan          | South Korea    | 3.22 | 0.17 |
| Cambodia       | Brazil         | 3.22 | 0.17 |
| JX, China      | Tanzania       | 3.22 | 0.17 |
| HK, China      | Tanzania       | 3.22 | 0.17 |
| United Kingdom | Germany        | 3.22 | 0.17 |
| Australia      | Belgium        | 3.21 | 0.17 |
| HB, China      | Thailand       | 3.21 | 0.17 |
| NX, China      | Belgium        | 3.21 | 0.17 |
| HK, China      | Slovenia       | 3.20 | 0.17 |
| ZJ, China      | Madagascar     | 3.20 | 0.17 |
| XZ, China      | Madagascar     | 3.20 | 0.17 |
| HB, China      | United Kingdom | 3.19 | 0.16 |
| French Guiana  | Tanzania       | 3.19 | 0.16 |
| HB, China      | Mozambique     | 3.16 | 0.16 |
| GD, China      | GX, China      | 3.09 | 0.16 |
| JX, China      | Slovenia       | 3.03 | 0.16 |
| United Kingdom | Belgium        | 3.01 | 0.16 |

Notes: HB, Hubei; ZJ, Zhejiang; AH, Anhui; GD, Guangdong; SN, Shaanxi; JX, Jiangxi; YN, Yunnan; JX, Jiangxi; HK, Hong Kong; SC, Sichuan; LN, Liaoning; GX, Guangxi; QH, Qinghai; XZ, Tibet; NX, Ningxia; HI, Hainan.

Table S5. Amino acid positions of glycosylation sites

|                     | F N-linked              | F O-GalNAc         | G N-linked               | G O-GalNAc                                      |
|---------------------|-------------------------|--------------------|--------------------------|-------------------------------------------------|
| BtHl-ParaV/YN2020A  | 58 61 85<br>429 436 486 | 432 438<br>442 444 | 19 50 159<br>338 439 606 | 137 587 588                                     |
| BtIi-ParaV/YN2020K  | 62 430<br>480 520       | -                  | 48 55 156<br>415         | 175 450                                         |
| BtSk-ParaV/GX2019A  | 58 61                   | -                  | 50 53 158<br>398 417     | 177 454                                         |
| BtRs-ParaV/GD2017E  | 58 64 87<br>431 487 529 | 98                 | 52 55 158<br>173         | 132 137 138<br>175 176 179<br>181 183 185       |
| BtRa-ParaV/YN2020D  | 59 68 88<br>432 487     | 325                | 23 54 57<br>160 283      | 145 169 181<br>183 187 356                      |
| BtHp-ParaV/GD2016H  | 15 59 88<br>432 487     | -                  | 26 51 157<br>172 445     | 142 145 148                                     |
| BtRpu-ParaV/YN2020H | 64 287<br>432 487       | 331                | 53 134 447<br>618        | 6 13 15<br>16 358 457<br>600 601 602<br>604 613 |
